1

2

## Structure of the human lipid-sensitive cation channel TRPC3

3

4

Chen Fan<sup>\*</sup>, Wooyoung Choi<sup>\*</sup>, Juan Du<sup>#</sup>, Wei Li<sup>#</sup>

5

6

Center for Cancer and Cell Biology

7

Van Andel Research Institute

8

333 Bostwick Ave. N.E., Grand Rapids, MI 49503

9

10

11

12

13 Running head. Architecture, domain arrangement, and ion-conducting pore of human TRPC3

14 **#CORRESPONDING AUTHOR**

15 Correspondence and requests for materials should be addressed to J. D. (email: [juan.du@vai.org](mailto:juan.du@vai.org))

16 TEL: (616) 234-5358, FAX: 616-234-5170 or W. L. (email: [wei.lu@vai.org](mailto:wei.lu@vai.org)). TEL: (616)

17 234-5022, FAX: 616-234-5170

18 <sup>\*</sup>These authors contributed equally to this work.

19 **Abstract**

20 The TRPC channels are crucially involved in store-operated calcium entry and calcium  
21 homeostasis, and they are thus implicated in human diseases such as neurodegenerative disease,  
22 cardiac hypertrophy, and spinocerebellar ataxia. We present structure of the full-length human  
23 TRPC3, a lipid-gated TRPC member, in a lipid-occupied, closed state at 3.3 Angstrom. TRPC3  
24 has an acorn-like shape with four elbow-like membrane reentrant helices prior to the first  
25 transmembrane helix. The TRP helix is perpendicular to, and thus disengaged from, the  
26 pore-lining S6, suggesting a different gating mechanism. The third transmembrane helix S3 is  
27 remarkably long, resulting in a windmill-like transmembrane domain, and constituting an  
28 extracellular domain that may serve as a sensor of external stimuli. We identified two lipid  
29 binding sites, one being sandwiched between the pre-S1 elbow and the S4-S5 linker, and the  
30 other being close to the ion-conducting pore, where the conserved LWF motif of the TRPC  
31 family is located.

32

33

34

35

36

37

## 38 **Introduction**

39           The cytosolic free  $\text{Ca}^{2+}$  concentration is strictly regulated because calcium is crucial to  
40 most cellular processes, from transcription control, to neurotransmitter release, to hormone  
41 molecule synthesis (Berridge et al., 2003; Kumar and Thompson, 2011; Sudhof, 2012). A major  
42 mechanism regulating calcium homeostasis is store-operated calcium entry (SOCE), which is  
43 triggered by the depletion of calcium stored in the endoplasmic reticulum (ER) (Ong et al., 2016;  
44 Smyth et al., 2010). This process activates store-operated channels (SOCs) in the plasma  
45 membrane, resulting in the influx of calcium that refills the calcium stores of the ER for further  
46 cellular stimulation (Prakriya and Lewis, 2015). A key component of SOCE has been identified  
47 as the TRPC channels, which are calcium-permeable, nonselective cation channels belonging to  
48 the TRP superfamily (Liu et al., 2003; Zhu et al., 1998; Zhu et al., 1996).

49           Among the seven members in TRPC family, TRPC3, TRPC6, and TRPC7 are the closest  
50 homologues, and they are unique in being activated by the lipid secondary messenger  
51 diacylglycerol (DAG), a degradation product of the signaling lipid phosphatidylinositol  
52 4,5-bisphosphate (PIP<sub>2</sub>) (Itsuki et al., 2012; Tang et al., 2001). However, the molecular  
53 mechanism of such activation remains elusive due to a lack of knowledge of the lipid binding  
54 sites. TRPC3, TRPC6, and TRPC7 share several functional domains, including N-terminal  
55 ankyrin repeats (AR), a transmembrane domain (TMD) with six transmembrane helices (S1-S6),  
56 and a C-terminal coiled-coil domain (CTD). They also exhibit an unusually long S3 helix, but  
57 the function of the S3 helix is poorly understood (Vazquez et al., 2004).

58 TRPC3 is abundantly expressed in the cerebellum, cerebrum, and smooth muscles, and it  
59 plays essential role in the regulation of neurogenesis and extracellular/intracellular calcium  
60 signaling (Gonzalez-Cobos and Trebak, 2010; Li et al., 1999). Dysfunction of TRPC3 has been  
61 linked to neurodegenerative disease, cardiac hypertrophy, and ovarian adenocarcinoma (Becker  
62 et al., 2011; Kitajima et al., 2016; Yang et al., 2009). Although TRPC3 has wide pharmaceutical  
63 applications in treatment of these diseases, drug development specifically targeting TRPC3 has  
64 been limited due to the lack of understanding of its molecular activation mechanisms (Oda et al.,  
65 2017; Xia et al., 2015). Here we report the structure of full-length human TRPC3 (hTRPC3) in a  
66 lipid-occupied, inactive state at an atomic resolution of 3.3 Å using single-particle cryo-electron  
67 microscopy (cryo-EM). Our structure revealed the first atomic view of TRPC3 channel and its  
68 two lipid binding sites, providing insight into the mechanisms of lipid activation and regulation  
69 of Ca<sup>2+</sup> homeostasis.

## 70 **Overall architecture**

71 Our three-dimensional reconstruction of hTRPC3 was of sufficient quality to allow *de novo*  
72 modeling of almost the entire protein (Fig. S 1, 2), with the exception of the first 21 N-terminal  
73 residues; the region connecting the TRP helix and the C-terminal domain (residues 688-757); the  
74 loop connecting the linker domain LD6 and LD7 (residues 281-291); and the last 30 C-terminal  
75 residues. Characterized by a distinctive one head–two tails shape, we identified two lipid-like  
76 densities, one sandwiched between the pre-S1 elbow and the S4-S5 linker, and the other wedged  
77 between the P loop and S6 of the adjacent subunit. Notably, we modeled two lipid molecules at



78 these two sites, nevertheless, we were not able to determine the identity of the lipids at current  
79 resolution. Interestingly, the TRP helix is perpendicular to the S6, and the density of the hinge  
80 region is poorly defined, even though both the TRP helix and S6 exhibit excellent densities  
81 (Figure 1a, b).

82 The overall structure of TRPC3 resembles an acorn, and it has a solely alpha-helical  
83 composition (Figure 1a-d). While TRPC3 shares a similar architecture of the TMD with other  
84 TRPCs, the third transmembrane helix, S3, is nearly twice as long as the S3 in any other  
85 DAG-insensitive TRPC channels (Fig. S 3). It elongates into the extracellular space and connects  
86 to the S4 through a remarkably long loop, where a glycosylation site is observed (Figure 1c, d).  
87 The extended structure of S3 gives rise to a windmill-like TMD, distinctive to voltage-gated  
88 potassium channels or TRP channels (Guo et al., 2017; Long et al., 2007; Paulsen et al., 2016;  
89 Shen et al., 2016; Winkler et al., 2017) (Figure 1e). Four elbow-like pre-S1 domains extrude  
90 from the TMD and are completely buried in detergent micelles, where the lipid 1 density is  
91 located (Figure 1, 2b). The C-terminal coiled-coil domain (CTD) is reminiscent of the TRPM4  
92 and TRPM8 structures, having a coiled-coil “pole” domain in the four-fold symmetry axis, and  
93 the “rib” helix penetrating into a “tunnel” composed by adjacent intracellular domains (Figure  
94 1f). This structure thus stabilizes the tetrameric assembly through hydrophobic and polar  
95 interactions (Figure 1b, 2b) (Winkler et al., 2017; Yin et al., 2018). The ankyrin repeat domain  
96 (ARD), located on the bottom of the channel and comprising four pairs of ARs, is significantly  
97 smaller than the ARD of TRPA1 and NOMPC (Jin et al., 2017; Paulsen et al., 2016) (Figure 2b,

98 c).

### 99 **Transmembrane domain and lipid-binding sites**

100 The TMD of TRPC3 shares topology similar to that of other TRP channels and voltage-gated  
101 ion channels, consisting of the S1-S4 domain and the pore domain arranged in a  
102 domain-swapped manner (Figure 1e, 3a). Nevertheless, the distinct activation mechanism of  
103 TRC3, TRPC6, and TRPC7 by DAG implies unique features of their TMD. Indeed, comparison  
104 of the relative arrangement of the S1-S4 domains with the pore domain shows remarkable  
105 differences between TRPC3 and TRPA1 or TRPM4, yet overall agreement with TRPV1 (Fig. S  
106 4). Detailed inspection of the TMD in TRPC3 reveals two unique features: a large elbow-like  
107 pre-S1 domain harboring a lipid-binding site (lipid 1), and unusually long S3 helix forming an  
108 extracellular domain (ECD), along with the S1-S2 linker and S3-S4 linker (Figure 3a, b).

109 The pre-S1 elbow, embedded in the lipid bilayer, consists of two half transmembrane  
110 helices (half TM1 and half TM2). The half TM1 connects to LD9, which is the last alpha helix in  
111 the LD; the half TM2 connects to the pre-S1 helix, a short alpha helix prior to S1 running  
112 horizontally along the intracellular face of the membrane (Figure 2a, 3c, 3d). This unique  
113 configuration pulls the intracellular half of S1 away from the pore center, resulting in a  
114 hydrophobic pocket behind the pre-S1 elbow and surrounded by half TM1 and S1 (Figure 3c).  
115 Moreover, the outward movement of S1 opens a window between itself and S5 from the adjacent  
116 subunit, exposing the intracellular half of S4 and the S4-S5 linker, which are key regions for TRP  
117 channel gating, to the lipid environment (Figure 3d).

118           Indeed, we observed a lipid-shaped density (lipid 1) in this pocket (Figure 3c, d). The head  
119 group of lipid 1 is well defined in the density map, forming several hydrogen bonds and polar  
120 interactions with residues in the LD9, the pre-S1 elbow, half TM1, and the S4-S5 linker, while the  
121 two hydrocarbon tails are in contact with S1, S4, the pre-S1 elbow, and half TM1 (Figure 3e, f). A  
122 similar pre-S1 elbow structure with lipid-like density has been observed in the *Drosophila*  
123 mechanosensitive channel NOMPC (Jin et al., 2017). We suggest that this lipid site may be  
124 crucially linked to channel activation, given its interaction with S4 and the S4-S5 linker. A  
125 mutation in this region (T561A on S4) results in gain of function, causing abnormal Purkinje cell  
126 development and cerebellar ataxia in moonwalker mice (Becker, 2014) (Fig. S 3).

127           We also identified a second lipid-like density (lipid 2) in the lateral fenestration of the pore  
128 domain, wedged between the P loop and S6 of adjacent subunit and forming both hydrophobic and  
129 hydrophilic interactions (Figure 3g, h). Moreover, lipid 2 is in close contact with the LFW motif on  
130 the P loop, which is highly conserved throughout the TRPC family and is crucial to channel  
131 function (Fig. S 3). Replacing this motif by three alanine residues in TRPC5 and TRPC6 resulted  
132 in a nonfunctional channel (Strubing et al., 2003). Therefore, the lipid 2 binding site likely  
133 represents another important modulation site. In addition to interaction with lipid 2, the LFW motif  
134 forms multiple hydrophobic interactions within the pore domain and therefore plays an important  
135 role in maintaining the proper structure of the pore domain (Figure 3i).

136           A second unique feature of TRPC3 is the remarkably long S3, stretching out into the  
137 extracellular side and supporting the formation of the ECD (Figure 3a). Within the ECD we

138 observed a cavity-like feature (Figure 3j), with S3 and the S3-S4 linker as a “back wall and roof”,  
139 and the S1-S2 linker forming the entrance. This cavity is located right above the lipid bilayer,  
140 and its interior is filled with both charged and hydrophobic residues (Figure 3j). Moreover, a  
141 tyrosine residue (Y589) in the loop connecting the S5 and the P loop plugs into the cavity (Figure  
142 3i). We speculate that the cavity may serve as a binding site for small molecules and that binding  
143 of small molecules may directly affect channel function through Y589, implying a role for the  
144 ECD as a sensor of external stimuli. This is in line with the finding that Pyr3, a TRPC3-specific  
145 inhibitor, likely binds to the extracellular side of the protein (Kiyonaka et al., 2009). Furthermore,  
146 a glycosylation site (N404) is observed in the S1-S2 loop, consistent with the prediction that  
147 TRPC3 is monoglycosylated in the extracellular side (Figure 3i) (Vannier et al., 1998). The site is  
148 very close to the P loop, suggesting that the glycosylation status may affect channel activity, and  
149 this is consistent with the report that N-linked glycosylation is a key determinant of the basal  
150 activity of TRPC3 (Dietrich et al., 2003). Further studies are necessary to clarify the  
151 physiological role of the ECD.

## 152 **TRP domain**

153 The TRP domain—the namesake region in the TRP channel located at the border between  
154 the transmembrane domain and the intracellular domain—is crucially involved in signal  
155 transduction and channel gating (Garcia-Sanz et al., 2007; Taberner et al., 2013). Similar to that  
156 of TRPM4, the TRP domain consists of a TRP helix that runs nearly parallel along the  
157 intracellular face of the membrane and a TRP re-entrant helix embedded in the lipid bilayer

158 (Autzen et al., 2018; Guo et al., 2017; Winkler et al., 2017) (Figure 4a). The TRP helix penetrates  
159 into the tunnel formed by the S4-S5 linker of the TMD on the top and the LD9 of the linker  
160 domain in the intracellular space on the bottom (Figure 4a), showing an apparently disengaged  
161 connection to the S6 helix through a loop of the hinge region instead of a continuous alpha  
162 helical structure as in TRPM4 (Figure 4b, e). While the densities for both S6 and TRP helix were  
163 well defined, their linker region was surprisingly poorly defined, indicating a high flexibility  
164 between the TRP helix and S6 (Figure 4b, 1b). The TRP helix forms an approximate right angle  
165 to the S6, in strong contrast to the TRPV1, TRPA1, and TRPM4 structures whose TRP helices  
166 form obtuse angles with S6 (Figure 4a-d). Given the crucial role of TRP helix in channel gating  
167 and its possible involvement in voltage dependence (Nilius et al., 2005b), the disengagement of  
168 TRP helix from the pore-lining S6 may provide a molecular basis for the unique gating  
169 mechanism of TRPC3 relative to other TRP subfamily channels (Itsuki et al., 2012).

170 Furthermore, the TRP helix forms a series of polar and hydrophobic interactions with the  
171 S4-S5 linker and the LD9 helix (Figure 4a). Specifically, the highly conserved tryptophan W673  
172 is extensively coupled with the S4-S5 linker through interactions with G552, P553, and P546.  
173 Mutation of the corresponding W673 in TRPV3 results in Olmsted syndrome (Ni et al., 2016), and  
174 replacement of the corresponding residue in NOMPC results in a channel that has increased  
175 current amplitude but is nonresponsive to mechanical stimuli (Jin et al., 2017). Mutation of the  
176 corresponding tryptophan in TRPV1 abolishes channel activation in response to depolarization  
177 (Gregorio-Teruel et al., 2014). Replacement of the corresponding G552 in TRPC4 and TRPC5 by

178 serine results in a constantly open channel (Beck et al., 2013). Another highly conserved  
179 tryptophan residue in the TRP helix, W681, tightly packs with W322 in the LD9 (Figure 4a and  
180 Fig. S 3). Interestingly, the highly conserved R677 in the TRP helix is close to the head group of  
181 lipid 1, and its replacement by histidine increases channel activity and results in neuronal cell  
182 death and cerebellar ataxia, perhaps by affecting the binding of lipid 1 (Figure 4a) (Fogel et al.,  
183 2016).

#### 184 **Ion-conducting pore**

185 The ion-conducting pore of TRPC3 is lined with an extracellular selectivity filter and an  
186 intracellular gate, with a wide central vestibule in the middle (Figure 5a). The pore adopts a  
187 closed conformation with the narrowest radius - at I658 and L654 on S6 close to the intracellular  
188 exit - of less than 1 Å, thus preventing ion passage (Figure 5b). Presumably, the channel is  
189 trapped in a lipid-bound inactive state or the bound lipids are not the activator DAG. The  
190 selectivity filter is defined by the backbone carbonyl oxygens of I613, F614 and G615 located in  
191 the P loop. The narrowest point at G615 has a radius of 2.1 Å, allowing partially dehydrated ions  
192 to pass through (Figure 5b, c). Moreover, five acidic residues in the P loop and the intracellular  
193 end of S6 in TRPC3 impose a negative electrostatic surface potential, which is important for  
194 cation selectivity (Figure 5a, d). On the intracellular site, the inner surface along the CTD and  
195 ARD contains acidic residues, giving rise to a negative charge and thus providing a possible  
196 pathway by which cations can access the cytoplasm (Figure 5a, e).

197 Similar to other Ca<sup>2+</sup>-permeable TRP channels, an acidic residue, E618, is located at the

198 entrance of the selectivity filter. An E618Q mutation impedes the calcium permeability of  
199 TRPC3, but it preserves monovalent permeation (Feng et al., 2013; Liu et al., 2007) (Figure 5b).  
200 The neutralization of the corresponding acidic amino acid on TRPV1 remarkably decreases  
201 channel's permeability to divalent ions (Garcia-Martinez et al., 2000). By contrast, replacement  
202 of a glutamine residue at the corresponding position (Q977) by an acidic amino acid in TRPM4,  
203 which is a  $\text{Ca}^{2+}$ -impermeable TRP channel, produced moderate  $\text{Ca}^{2+}$  permeability (Nilius et al.,  
204 2005a). Thus, having an acidic residue close to the selectivity filter may represent a general  
205 principle of permeability for divalent cations in nonselective  $\text{Ca}^{2+}$ -permeable TRP channels.

## 206 **The intracellular domain**

207 TRPC3 exhibits a similar intracellular domain composition as TRPA1, including a C-terminal  
208 CTD and a N-terminal ARD. We found several unanticipated features that advance our  
209 understanding of the molecular basis of TRPC family (Figure 6a). First, the ARD in TRPC3,  
210 consisting of 4 ARs, is significantly shorter than that in TRPA1 (16 repeats). Second, instead of a  
211 straight coiled-coil domain as in TRPA1, TRPC3 adopts the characteristic umbrella-like CTD  
212 “pole” and “rib” domain of the TRPM family (Figure 6b, c). Interestingly, the turn from the pole  
213 to the rib helix is where the ankyrin repeats end. Third, between the rib domain and TRP helix,  
214 there is a linker domain that has remarkable structural similarities to the MHR4 (TRPM  
215 homology region) domain in TRPM4 (Autzen et al., 2018; Guo et al., 2017; Winkler et al., 2017),  
216 as well as to the linker domain in NOMPC (Jin et al., 2017). The location of the linker domain  
217 suggests a role for signal transduction from ARD and CTD further to TMD. Overall, the TRPC3

218 forms a unique intracellular domain that has structural features characteristic of the TRPM,  
219 TRPA, and NOMPC families. Although the functional role of the intracellular domain is yet  
220 unknown, it clearly contributes to the channel assembly through three major interfaces. The first  
221 interface is contributed by the vertical CTD pole helices of the four subunits winding into a  
222 tetrameric coiled-coil assembly (Figure 6b, c). This is a common feature employed to specify  
223 subunit assembly and assembly specificity within the voltage-gated ion channel superfamily  
224 (Figure 6b, c). The second interface is formed by the horizontal CTD rib helix penetrating through  
225 the tunnel composed of ARD and LD from neighboring subunits, thus tethering them together  
226 (Figure 6c, d). Notably, the rib helix is rich in positively charged residues, forming multiple  
227 interactions with the charged residues in the LD. The third interface is located between LD and  
228 LD/pre-S1 elbow of the adjacent subunit (Figure 6e). All these interactions knit the tetramer  
229 together.

## 230 **Conclusion**

231 The TRPC3 structure displays a unique acorn-like architecture. Distinct to the TRPM, TRPV or  
232 TRPA channels whose TRP helix and S6 form a continuous alpha helical structure, the TRP helix  
233 in TRPC3 is disengaged from the S6, which aligns with the unique gating mechanism of TRPC,  
234 perhaps linked to the lipid activation or voltage independence. The remarkably long S3 endows  
235 TRPC3 a windmill-like TMD and frames the ECD in which a cavity may act as a binding site for  
236 small molecules, suggesting a role for the ECD in sensing extracellular stimuli. We identified  
237 two lipid binding sites, one buried in a pocket surrounded by the pre-S1 elbow, S1, and the S4-S5



238 linker, and the other inserted into the lateral fenestration of the pore domain. Our structure  
239 provides a framework for understanding the complex gating mechanism of TRPC3.

## 240 **Figure legends**

241 **Figure 1. Architecture of human TRPC3.** (a) Three-dimensional reconstruction viewed parallel  
242 to the membrane. The transparent envelope denotes the unsharpened reconstruction. (b) Slice  
243 view of the reconstruction showing the interior of the channel. (c-f) Atomic model of TRPC3  
244 viewed parallel to the membrane (c-d), from the extracellular side (e), and from the intracellular  
245 side (f). Each subunit is colored differently.

246 **Figure 2. Structure of a single subunit.** (a) The schematic representation of TRPC3 domain  
247 organization. Dashed lines indicate the regions that have not been modeled. (b-c) Cartoon  
248 representation of one subunit color-coded to match panel a.

249 **Figure 3. Transmembrane domain, extracellular domain, and lipid-binding sites.** (a)  
250 Domain organization. The channel is shown in surface representation, with one subunit shown in  
251 cartoon representation. The colors match those in Figure 2a. (b) Details of the transmembrane  
252 domain and extracellular domain. (c-d) Pre-S1 elbow and binding site of lipid 1. The lipid  
253 molecule is buried inside the pocket formed by pre-S1 elbow, S1, and the S4-S5 linker. Two  
254 adjacent subunits (blue and yellow) are shown in both cartoon and surface representations. The  
255 lipid molecule is shown as sticks. (e-f) Residues that interact with lipid 1 are shown in sticks, and  
256 protein is shown in cartoon representation. Lipid density is shown in mesh. (g-h) Lipid 2 binds

257 between S6 and the P loop of adjacent subunits, which are in light blue and wheat. (i) Structure  
258 of the ECD. Key residues forming the cavity is shown in sticks. Adjacent subunits are in light  
259 blue and wheat. (j) Surface representation of the ECD, colored according to the electrostatic  
260 surface potential. The color gradient is from -5 to 5 kT/e (red to blue).

261 **Figure 4. The TRP domain.** (a). Cartoon representation of the TRP helix, pre-S1 elbow, TMD,  
262 and linker domain, showing their interaction. Lipid 1 is shown in sticks. W673 on the TRP helix  
263 stacks with P553 and G552 forming a hydrogen bond with the backbone oxygen (dashed line) of  
264 P546 on the S4-S5 linker. The side chain of R677 is in close contact with the head group of lipid  
265 1. (b-e). The pore lining helix S6 and the TRP helix in TRPC3 (b), TRPV1 (c), TRPA1 (d), and  
266 TRPM4 (e). The angle between the S6 and TRP helices are indicated; only two subunits are  
267 shown for clarity. The hinge connecting the S6 and TRP helix is highlighted in red.

268 **Figure 5: The ion-conducting pore.** (a, d, e) Surface representation of TRPC3, viewed (a)  
269 parallel to the membrane, (d) from the extracellular side, and (e) from the intracellular side. The  
270 surface is colored according to electrostatic surface potential; the color gradient is from -5 to 5  
271 kT/e (red to blue). The protein is also shown in cartoon representation in (a). (b) The shape and  
272 size of the ion-conducting pore (boxed area in panel a). The P loop and S6 of two subunits and the  
273 TRP helix of the other two subunits are shown as cartoons, and the side chains of restriction  
274 residues are shown as sticks. Purple, green, and red spheres define radii of > 2.3, 1.2–2.3, and < 1.2  
275 Å, respectively. (c) Plot of pore radius as a function of distance along the pore axis in Angstroms.

276 **Figure 6. The intracellular domain.** (a) Surface representation of TRPC3 with two adjacent  
277 subunits shown in cartoon representation. The intracellular domain is highlighted in the black  
278 frame. Two interfaces highlighted in green frames are enlarged in (d-e). (b-c) Cartoon  
279 representation of the CTD coiled-coil pole and the rib helix. The intracellular domain is shown in  
280 surface representation, viewed in parallel to the membrane (b) and from the intracellular side (c).  
281 (d) Inter-subunit interface formed by the CTD rib helix with adjacent ARD and LD. Protein is  
282 shown in cartoon and surface representations. Two adjacent subunits are in blue and red. Charged  
283 residues forming hydrogen bond or polar interaction with each other are shown as sticks. (e)  
284 Interface between adjacent LDs and pre-S1. Alpha helices involved in the inter-subunit  
285 interaction are indicated.

286 **Fig. S 1. Cryo-EM analysis of human full-length TRPC3.** (a) Representative electron  
287 micrograph. (b) Selected two-dimensional class averages of the electron micrographs. (c) The  
288 gold-standard Fourier shell correlation curve for the EM maps is shown in black and the FSC  
289 curve between the atomic model and the final EM map is shown in blue. (d) Angular distribution  
290 of particles used for refinement.

291 **Fig. S 2. Cryo-EM map of human full-length TRPC3.** (a-b) Local resolution estimation. The  
292 map is colored according to local resolution estimation. (c) Representative densities Density  
293 maps are shown in blue meshes, and the atomic models are shown in cartoon representation with  
294 side chains as sticks.

295 **Fig. S 3. Secondary structure arrangement of human TRPC3 and sequence alignment of**  
296 **TRPC family channels.** The TRPC2 is from *mus musculus*, whereas all the other proteins are  
297 from human. The sequences were aligned using the Clustal Omega program on the Uniprot  
298 website and coloured using BLOSUM62 score by conservation. The secondary structural  
299 elements are color-coded to match Figure 2a.

300 **Fig. S 4. Comparison of the TMD of TRPC3 with TRPV1 (a), TRPA1 (b), and TRPM4 (c).**  
301 Structures are aligned using main chain atoms of the pore domain. Only the TMD of one subunit  
302 is shown in cartoon representation, viewed in parallel to the membrane. TRPC3 is in blue;  
303 TRPV1, TRPA1, and TRPM4 are in pink. (d-e) TMD viewed from extracellular side. The  
304 relative organization of the S1-S4 domain with the pore domain in TRPC3 is similar to that in  
305 TRPV1, but the S1-S4 domain in TRPC3 exhibits a clockwise rotation relative to TRPA1 or  
306 TRPM4.

307 **Table S 1. Statistics of EM data processing and model refinement.**

## 308 **Methods**

### 309 **Construct, expression and purification of TRPC3**

310 A full-length human *TRPC3* gene (UniProtKB (<http://www.uniprot.org>) accession number,  
311 Q13507) with 836 amino acid residues was synthesized by Genscript and was subcloned into a  
312 modified version of pEG BacMam vector containing: a twin strep-tag, a His8-tag, and green  
313 fluorescent protein (GFP) with thrombin cleavage site at the N terminus (Goehring et al., 2014).  
314 The recombinant Bacmid DNA and baculovirus of TPRC3 were generated by sf9 insect cells,

315 and P2 viruses were used to infect suspension HEK293 cells.

316 For large-scale expression, suspension HEK293 cells were cultured in Freestyle 293  
317 expression Medium (Invitrogen) with 1% (v/v) fetal bovine serum (FBS). When cell density  
318 reached around 3 million/ml, 8% (v/v) of P2 viruses were introduced. At 12 h post-infection, 10  
319 mM sodium butyrate was supplemented and then cells were transferred to 30 °C. The infected  
320 cells were collected at 48 h post-infection by centrifugation at 4000 rpm for 15 min at 4 °C and  
321 then was washed once with TBS buffer (20 mM Tris, pH 8.0, 150 mM NaCl).

322 TRPC3 was extracted from the cells by solubilization buffer containing 20 mM Tris 8.0,  
323 500 mM NaCl in the presence of 1 mM PMSF, 0.8 μM aprotinin, 2 μg/ml leupeptin, and 2 mM  
324 pepstatin A with 1% digitonin (Calbiochem) for 2 h at 4 °C. The cell debris were eradicated by  
325 ultracentrifugation at 40,000 rpm using 45 Ti rotor (Beckman Coulter, Inc.) for 1 h at 4 °C. The  
326 solubilized proteins were incubated with TALON resin and the resin was washed with 10 column  
327 volumes of wash buffer (20 mM Tris 8.0, 500 mM NaCl, 15 mM imidazole, and 0.1% digitonin).  
328 The TALON resin-bound TRPC3 was eluted with elution buffer (20 mM Tris 8.0, 500 mM NaCl,  
329 250 mM imidazole, and 0.1% digitonin). Thrombin (1:20 molar ratio) and 10 mM EDTA were  
330 added into the eluted sample and incubated for 3 h on the ice. In order to further purify the  
331 protein, the sample was concentrated and loaded onto a superpose6 column in buffer containing  
332 20 mM Tris 8.0, 500 mM NaCl, 1 mM EDTA with 0.1% digitonin. Peak fractions containing  
333 TRPC3 were pooled and concentrated to 5 mg/ml.

334 **EM sample preparation and data acquisition**

335 The purified TRPC3 protein sample (2.5  $\mu\text{L}$ ) at a concentration of 5 mg/mL was applied onto a  
336 glow-discharged Quantifoil holey carbon grid (gold, 1.2/1.3  $\mu\text{m}$  size/hole space, 300 mesh). The  
337 grid was blotted for 1.5 s at 100% humidity by using a Vitrobot Mark III, and then was plunged  
338 into liquid ethane cooled by liquid nitrogen. Images were obtained by an FEI Titan Krios  
339 electron microscope operating at 300 kV with a nominal magnification of 130,000 $\times$  Gatan K2  
340 Summit direct electron detector was used in order to record image stacks in super-resolution  
341 counting mode with a binned pixel size of 1.074  $\text{\AA}$ . Every image was dose-fractionated to 40  
342 frames with a total exposure time of 8 s with 0.2 s per frame. Dose rate was 6.76  $\text{e}^- \text{\AA}^{-2} \text{s}^{-1}$ . The  
343 images stacks were recorded using the automated acquisition program SerialEM (Mastronarde,  
344 2005). Nominal defocus values varied from 1.0 to 2.5  $\mu\text{m}$ .

#### 345 **EM data processing**

346 MotionCor2 was used to implement motion-correction of summed movie stacks(Zheng et al.,  
347 2017). Gctf was applied to estimate Defocuse values (Zhang, 2016). Particles were picked from  
348 approximately 200 micrographs using Gautomatch  
349 (<http://www.mrc-lmb.cam.ac.uk/kzhang/Gautomatch/>) and subjected to an initial reference-free  
350 2D classification using Relion 2.1(Scheres, 2012). Nine representative 2D class averages were  
351 selected as templates for automated particle picking for the entire data set using Gautomatch. The  
352 auto-picked particles were visually checked and obvious bad particles were manually removed.  
353 The picked particles were cleaned up throughout three rounds of 2D classification. CryoSPARC  
354 was applied to obtain an initial model (Punjani et al., 2017). The selected particles after 2D

355 classification were subjected to 3D classification of 5 classes using Relion 2.1, with the initial  
356 reconstruction low-pass-filtered to 60 Å as a reference model. Only one out of five classes  
357 presented high-resolution features, hence, particles from this class were combined and further  
358 refined via Relion 2.1. Particles were further refined using the local refinement from FREALIGN  
359 with C4 symmetry applied and high-resolution limit for particle alignment set to 4.5 Å (Grigorieff,  
360 2016). The resolutions reported are based on the “limiting resolution” procedure in which the  
361 resolution during refinement is limited to a lower resolution than the resolution estimated for the  
362 final reconstruction. The final resolutions reported in Table supplement 1 are based on the gold  
363 standard Fourier shell correlation (FSC) 0.143 criteria. To calculate the FSC plot, a soft mask  
364 (4.3 Å extended from the reconstruction with an additional 4.3 Å cosine soft edge, low-pass  
365 filtered to 10 Å) was applied to the two half maps.

### 366 **Model building**

367 The model of TRPC3 was built in Coot using the TMD domain of TRPM4 structure (PDB 5wp6)  
368 as a guide (Emsley et al., 2010). *De novo* building was mainly guided by bulky residues and  
369 secondary structure prediction (Fig. S 3). The TRPC3 structure chiefly consists of  $\alpha$  helices,  
370 which greatly assisted register assignment. In the initial *de novo*-built model, the order and  
371 length of the secondary structure features, as well as the positions of bulky residues within each  
372 secondary structure feature are in good agreement with the prediction (Fig. S 3). The initial  
373 model was then subjected to real space refinement using Phenix.real\_space\_refine with  
374 secondary structure restraints (Afonine et al., 2012). The refined model was manually examined

375 and re-modified via COOT. For validation of refined structure, FSC curves were applied to  
376 calculate the difference between the final model and EM map. The geometries of the atomic  
377 models were evaluated using MolProbity (Chen et al., 2010). All figures were prepared using  
378 UCSF Chimera and Pymol (Schrödinger) (The PyMOL Molecular Graphics System)(Pettersen et  
379 al., 2004).

### 380 **Data Availability**

381 The cryo-EM density map and coordinate of TRPC3 have been deposited in the Electron  
382 Microscopy Data Bank (EMDB) accession number EMD-XXXX, and in the RCSB Protein Data  
383 Bank (PDB) accession code XXXX.

### 384 **Acknowledgements**

385 We thank G. Zhao and X. Meng for the support with data collection at the David Van Andel  
386 Advanced Cryo-Electron Microscopy Suite. We appreciate the VARI High-Performance  
387 Computing team for computational support. We thank D. Nadziejka for technical editing, and  
388 C-H. Lee for helpful discussion. This work was supported by internal VARI funding.

### 389 **Author Contributions**

390 W. L. and J. D. initiated the project. C. F. and W. C. carried out protein purification and initial  
391 cryo-EM experiments, including grid preparation and initial grid screening for optimizing grid  
392 conditions. All the authors contributed in cryo-EM data collection and processing, structure  
393 analysis, and preparation of the manuscript.



394

## 395 **References**

- 396 Afonine, P.V., Grosse-Kunstleve, R.W., Echols, N., Headd, J.J., Moriarty, N.W., Mustyakimov,  
397 M., Terwilliger, T.C., Urzhumtsev, A., Zwart, P.H., and Adams, P.D. (2012). Towards automated  
398 crystallographic structure refinement with phenix.refine. *Acta Crystallogr D* 68, 352-367.
- 399 Autzen, H.E., Myasnikov, A.G., Campbell, M.G., Asarnow, D., Julius, D., and Cheng, Y.F. (2018).  
400 Structure of the human TRPM4 ion channel in a lipid nanodisc. *Science* 359, 228-232.
- 401 Beck, A., Speicher, T., Stoerger, C., Sell, T., Dettmer, V., Jusoh, S.A., Abdulmughni, A., Cavalie,  
402 A., Philipp, S.E., Zhu, M.X., *et al.* (2013). Conserved Gating Elements in TRPC4 and TRPC5  
403 Channels. *J Biol Chem* 288, 19471-19483.
- 404 Becker, E.B.E. (2014). The Moonwalker Mouse: New Insights into TRPC3 Function, Cerebellar  
405 Development, and Ataxia. *Cerebellum* 13, 628-636.
- 406 Becker, E.B.E., Fogel, B.L., Rajakulendran, S., Dulneva, A., Hanna, M.G., Perlman, S.L.,  
407 Geschwind, D.H., and Davies, K.E. (2011). Candidate Screening of the TRPC3 Gene in  
408 Cerebellar Ataxia. *Cerebellum* 10, 296-299.
- 409 Berridge, M.J., Bootman, M.D., and Roderick, H.L. (2003). Calcium signalling: Dynamics,  
410 homeostasis and remodelling. *Nat Rev Mol Cell Bio* 4, 517-529.
- 411 Chen, V.B., Arendall, W.B., Headd, J.J., Keedy, D.A., Immormino, R.M., Kapral, G.J., Murray,  
412 L.W., Richardson, J.S., and Richardson, D.C. (2010). MolProbity: all-atom structure validation  
413 for macromolecular crystallography. *Acta Crystallogr D* 66, 12-21.
- 414 Dietrich, A., Schnitzler, M.M.Y., Emmel, J., Kalwa, H., Hofmann, T., and Gudermann, T. (2003).  
415 N-linked protein glycosylation is a major determinant for basal TRPC3 and TRPC6 channel  
416 activity. *J Biol Chem* 278, 47842-47852.
- 417 Emsley, P., Lohkamp, B., Scott, W.G., and Cowtan, K. (2010). Features and development of Coot.  
418 *Acta Crystallogr D* 66, 486-501.
- 419 Feng, S.J., Li, H.Y., Tai, Y.L., Huang, J.B., Su, Y.J., Abramowitz, J., Zhu, M.X., Birnbaumer, L.,  
420 and Wang, Y.Z. (2013). Canonical transient receptor potential 3 channels regulate mitochondrial  
421 calcium uptake. *P Natl Acad Sci USA* 110, 11011-11016.
- 422 Fogel, B., Hanson, S., and Becker, E. (2016). Mutation of the Murine Ataxia Gene TRPC3  
423 Causes Cerebellar Ataxia in Humans. *Neurology* 86, 284-286.
- 424 Garcia-Martinez, C., Morenilla-Palao, C., Planells-Cases, R., Merino, J.M., and Ferrer-Montiel,  
425 A. (2000). Identification of an aspartic residue in the P-loop of the vanilloid receptor that  
426 modulates pore properties. *J Biol Chem* 275, 32552-32558.
- 427 Garcia-Sanz, N., Valente, P., Gomis, A., Fernandez-Carvajal, A., Fernandez-Ballester, G., Viana,  
428 F., Belmonte, C., and Ferrer-Montiel, A. (2007). A role of the transient receptor potential domain  
429 of vanilloid receptor I in channel Gating. *J Neurosci* 27, 11641-11650.
- 430 Goehring, A., Lee, C.H., Wang, K.H., Michel, J.C., Claxton, D.P., Bacongus, I., Althoff, T.,  
431 Fischer, S., Garcia, K.C., and Gouaux, E. (2014). Screening and large-scale expression of  
432 membrane proteins in mammalian cells for structural studies. *Nat Protoc* 9, 2574-2585.

- 433 Gonzalez-Cobos, J.C., and Trebak, M. (2010). TRPC channels in smooth muscle cells. *Front*  
434 *Biosci-Landmrk* *15*, 1023-1039.
- 435 Gregorio-Teruel, L., Valente, P., Gonzalez-Ros, J.M., Fernandez-Ballester, G., and Ferrer-Montiel,  
436 A. (2014). Mutation of I696 and W697 in the TRP box of vanilloid receptor subtype I modulates  
437 allosteric channel activation. *J Gen Physiol* *143*, 361-375.
- 438 Grigorieff, N. (2016). Frealign: An Exploratory Tool for Single-Particle Cryo-EM. *Methods*  
439 *Enzymol* *579*, 191-226.
- 440 Guo, J.T., She, J., Zeng, W.Z., Chen, Q.F., Bai, X.C., and Jiang, Y.X. (2017). Structures of the  
441 calcium-activated, non-selective cation channel TRPM4. *Nature* *552*, 205-209.
- 442 Itsuki, K., Imai, Y., Okamura, Y., Abe, K., Inoue, R., and Mori, M.X. (2012). Voltage-sensing  
443 phosphatase reveals temporal regulation of TRPC3/C6/C7 channels by membrane  
444 phosphoinositides. *Channels* *6*, 206-209.
- 445 Jin, P., Bulkley, D., Guo, Y.M., Zhang, W., Guo, Z.H., Huynh, W., Wu, S.P., Meltzer, S., Cheng,  
446 T., Jan, L.Y., *et al.* (2017). Electron cryo-microscopy structure of the mechanotransduction  
447 channel NOMPC. *Nature* *547*, 118-122.
- 448 Kitajima, N., Numaga-Tomita, T., Watanabe, M., Kuroda, T., Nishimura, A., Miyano, K., Yasuda,  
449 S., Kuwahara, K., Sato, Y., Ide, T., *et al.* (2016). TRPC3 positively regulates reactive oxygen  
450 species driving maladaptive cardiac remodeling. *Sci Rep-Uk* *6*, 1-14.
- 451 Kiyonaka, S., Kato, K., Nishida, M., Mio, K., Numaga, T., Sawaguchi, Y., Yoshida, T., Wakamori,  
452 M., Mori, E., Numata, T., *et al.* (2009). Selective and direct inhibition of TRPC3 channels  
453 underlies biological activities of a pyrazole compound. *P Natl Acad Sci USA* *106*, 5400-5405.
- 454 Kumar, R., and Thompson, J.R. (2011). The Regulation of Parathyroid Hormone Secretion and  
455 Synthesis. *J Am Soc Nephrol* *22*, 216-224.
- 456 Li, H.S., Xu, X.Z.S., and Montell, C. (1999). Activation of a TRPC3-dependent cation current  
457 through the neurotrophin BDNF. *Neuron* *24*, 261-273.
- 458 Liu, C.H., Wang, T., Postma, M., Obukhov, A.G., Montell, C., and Hardie, R.C. (2007). In vivo  
459 identification and manipulation of the Ca<sup>2+</sup> selectivity filter in the drosophila transient receptor  
460 potential channel. *J Neurosci* *27*, 604-615.
- 461 Liu, X.B., Singh, B.B., and Ambudkar, I.S. (2003). TRPC1 is required for functional  
462 store-operated Ca<sup>2+</sup> channels - Role of acidic amino acid residues in the S5-S6 region. *J Biol*  
463 *Chem* *278*, 11337-11343.
- 464 Long, S.B., Tao, X., Campbell, E.B., and MacKinnon, R. (2007). Atomic structure of a  
465 voltage-dependent K<sup>+</sup> channel in a lipid membrane-like environment. *Nature* *450*, 376-382.
- 466 Mastronarde, D.N. (2005). Automated electron microscope tomography using robust prediction  
467 of specimen movements. *J Struct Biol* *152*, 36-51.
- 468 Ni, C., Yan, M., Zhang, J., Cheng, R.H., Liang, J.Y., Deng, D., Wang, Z., Li, M., and Yao, Z.  
469 (2016). A novel mutation in TRPV3 gene causes atypical familial Olmsted syndrome. *Sci*  
470 *Rep-Uk* *6*, 1-10.
- 471 Nilius, B., Prenen, J., Janssens, A., Owsianik, G., Wang, C.B., Zhu, M.X., and Voets, T. (2005a).  
472 The selectivity filter of the cation channel TRPM4. *J Biol Chem* *280*, 22899-22906.
- 473 Nilius, B., Talavera, K., Owsianik, G., Prenen, J., Droogmans, G., and Voets, T. (2005b). Gating

474 of TRP channels: a voltage connection? *J Physiol-London* 567, 35-44.

475 Oda, K., Umemura, M., Nakakaji, R., Tanaka, R., Sato, I., Nagasako, A., Oyamada, C.,  
476 Baljinnyam, E., Katsumata, M., Xie, L.H., *et al.* (2017). Transient receptor potential cation 3  
477 channel regulates melanoma proliferation and migration. *J Physiol Sci* 67, 497-505.

478 Ong, H.L., de Souza, L.B., and Ambudkar, I.S. (2016). Role of TRPC Channels in  
479 Store-Operated Calcium Entry. *Adv Exp Med Biol* 898, 87-109.

480 Paulsen, C.E., Armache, J.P., Gao, Y., Cheng, Y.F., and Julius, D. (2016). Structure of the TRPA1  
481 Ion Channel Suggests Regulatory Mechanisms. *Biophys J* 110, 26a-26a.

482 Pettersen, E.F., Goddard, T.D., Huang, C.C., Couch, G.S., Greenblatt, D.M., Meng, E.C., and  
483 Ferrin, T.E. (2004). UCSF chimera - A visualization system for exploratory research and analysis.  
484 *J Comput Chem* 25, 1605-1612.

485 Prakriya, M., and Lewis, R.S. (2015). Store-Operated Calcium Channels. *Physiol Rev* 95,  
486 1383-1436.

487 Punjani, A., Rubinstein, J.L., Fleet, D.J., and Brubaker, M.A. (2017). cryoSPARC: algorithms for  
488 rapid unsupervised cryo-EM structure determination. *Nat Methods* 14, 290-296.

489 Scheres, S.H.W. (2012). RELION: Implementation of a Bayesian approach to cryo-EM structure  
490 determination. *J Struct Biol* 180, 519-530.

491 Shen, P.S., Yang, X.Y., DeCaen, P.G., Liu, X.W., Bulkley, D., Clapham, D.E., and Cao, E.H.  
492 (2016). The Structure of the Polycystic Kidney Disease Channel PKD2 in Lipid Nanodiscs. *Cell*  
493 167, 763-773.

494 Smyth, J.T., Hwang, S.Y., Tomita, T., DeHaven, W.I., Mercer, J.C., and Putney, J.W. (2010).  
495 Activation and regulation of store-operated calcium entry. *J Cell Mol Med* 14, 2337-2349.

496 Strubing, C., Krapivinsky, G., Krapivinsky, L., and Clapham, D.E. (2003). Formation of novel  
497 TRPC channels by complex subunit interactions in embryonic brain. *J Biol Chem* 278,  
498 39014-39019.

499 Sudhof, T.C. (2012). Calcium Control of Neurotransmitter Release. *Csh Perspect Biol* 4.

500 Taberner, F.J., Lopez-Cordoba, A., Fernandez-Ballester, G., Korchev, Y., and Ferrer-Montiel, A.  
501 (2013). Mutations in the TRP Domain Differentially affect the Function of TRPM8. *Biophys J*  
502 104, 456a-456a.

503 Tang, J., Lin, Y.K., Zhang, Z.M., Tikunova, S., Birnbaumer, L., and Zhu, M.X. (2001).  
504 Identification of common binding sites for calmodulin and inositol 1,4,5-trisphosphate receptors  
505 on the carboxyl termini of Trp channels. *J Biol Chem* 276, 21303-21310.

506 Vannier, B., Zhu, X., Brown, D., and Birnbaumer, L. (1998). The membrane topology of human  
507 transient receptor potential 3 as inferred from glycosylation-scanning mutagenesis and epitope  
508 immunocytochemistry. *J Biol Chem* 273, 8675-8679.

509 Vazquez, G., Wedel, B.J., Aziz, O., Trebak, M., and Putney, J.W. (2004). The mammalian TRPC  
510 cation channels. *Bba-Mol Cell Res* 1742, 21-36.

511 Winkler, P.A., Huang, Y.H., Sun, W.N., Du, J., and Lu, W. (2017). Electron cryo-microscopy  
512 structure of a human TRPM4 channel. *Nature* 552, 200-204.

513 Xia, M., Liu, D., and Yao, C. (2015). TRPC3: A New Target for Therapeutic Strategies in  
514 Chronic Pain - DAG-mediated Activation of Non-selective Cation Currents and Chronic Pain. *J*

515 Neurogastroenterol *21*, 445-447.  
516 Yang, S.L., Cao, Q., Zhou, K.C., Feng, Y.J., and Wang, Y.Z. (2009). Transient receptor potential  
517 channel C3 contributes to the progression of human ovarian cancer. *Oncogene* *28*, 1320-1328.  
518 Yin, Y., Wu, M.Y., Zubcevic, L., Borschel, W.F., Lander, G.C., and Lee, S.Y. (2018). Structure of  
519 the cold- and menthol-sensing ion channel TRPM8. *Science* *359*, 237-241.  
520 Zhang, K. (2016). Gctf: Real-time CTF determination and correction. *J Struct Biol* *193*, 1-12.  
521 Zheng, S.Q., Palovcak, E., Armache, J.P., Verba, K.A., Cheng, Y.F., and Agard, D.A. (2017).  
522 MotionCor2: anisotropic correction of beam-induced motion for improved cryo-electron  
523 microscopy. *Nat Methods* *14*, 331-332.  
524 Zhu, X., Jiang, M.S., and Birnbaumer, L. (1998). Receptor-activated Ca<sup>2+</sup> influx via human  
525 Trp3 stably expressed in human embryonic kidney (HEK)293 cells - Evidence for a  
526 non-capacitative Ca<sup>2+</sup> entry. *J Biol Chem* *273*, 133-142.  
527 Zhu, X., Jiang, M.S., Peyton, M., Boulay, G., Hurst, R., Stefani, E., and Birnbaumer, L. (1996).  
528 trp, a novel mammalian gene family essential for agonist-activated capacitative Ca<sup>2+</sup> entry. *Cell*  
529 *85*, 661-671.  
530  
531

Figure 1

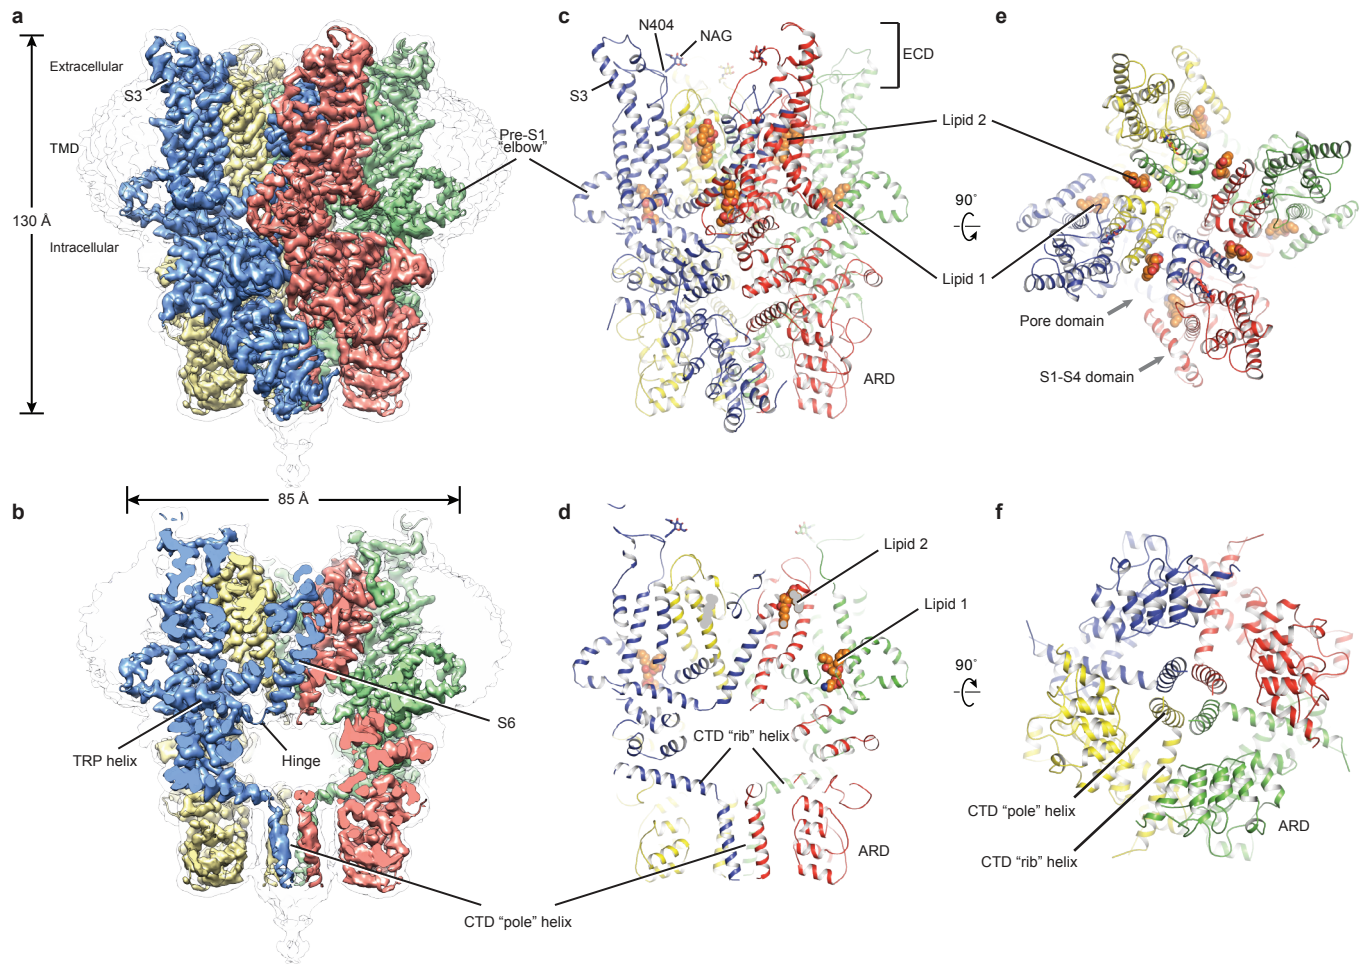



Figure 2

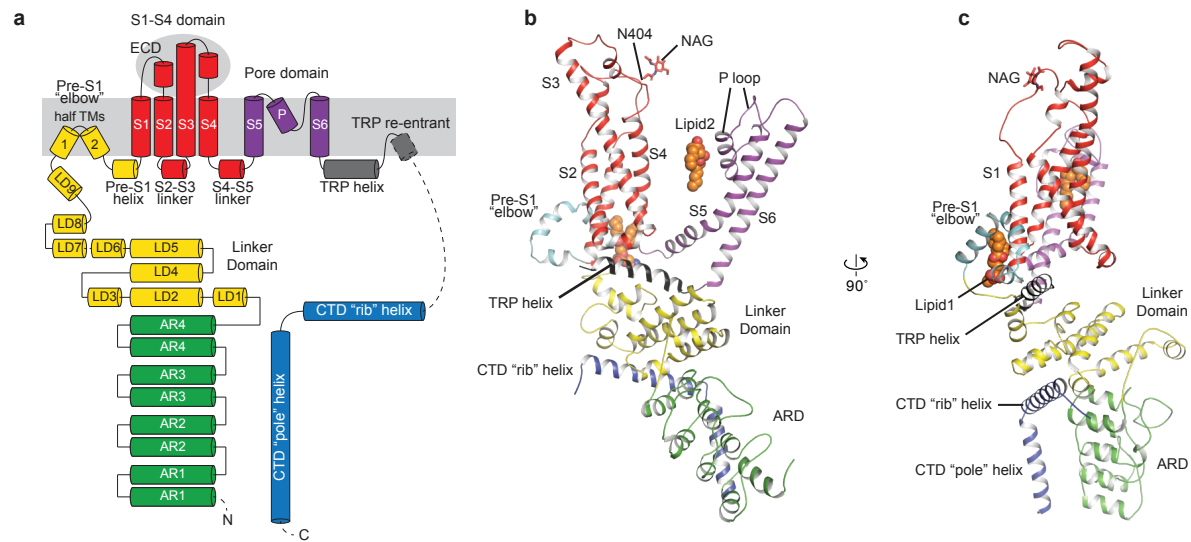

Figure 3

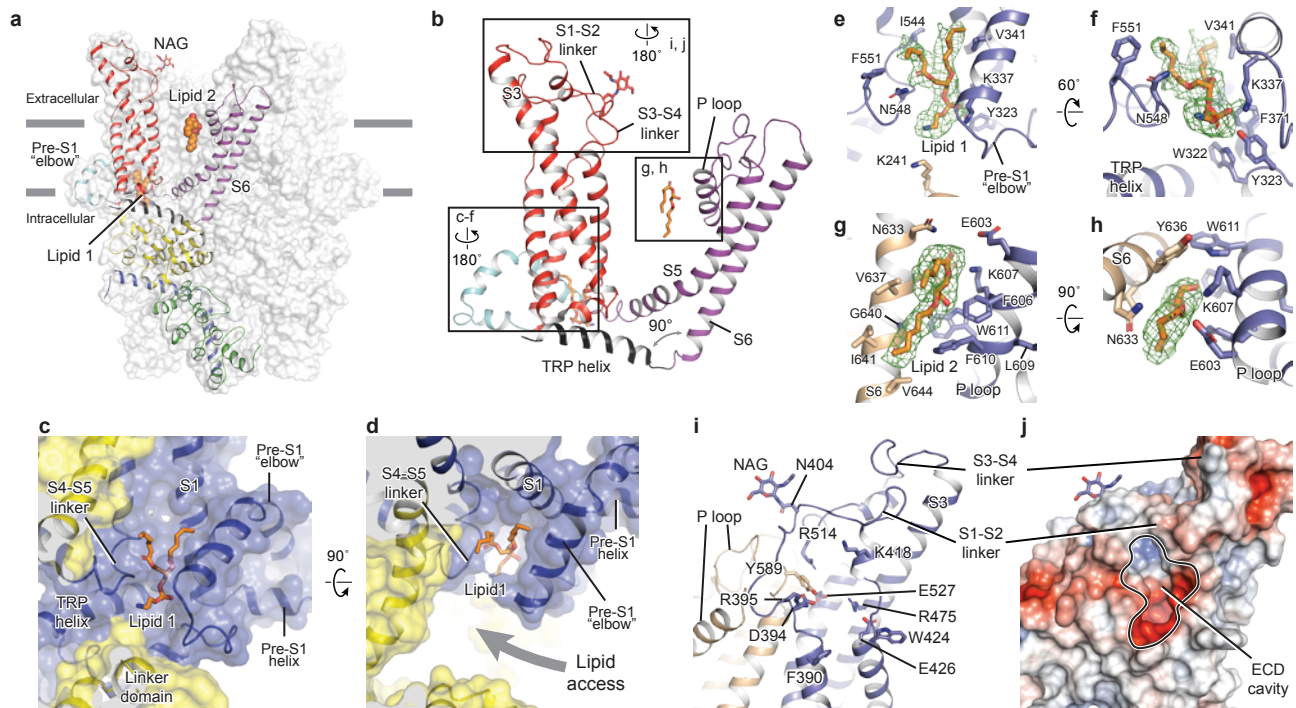

Figure 4

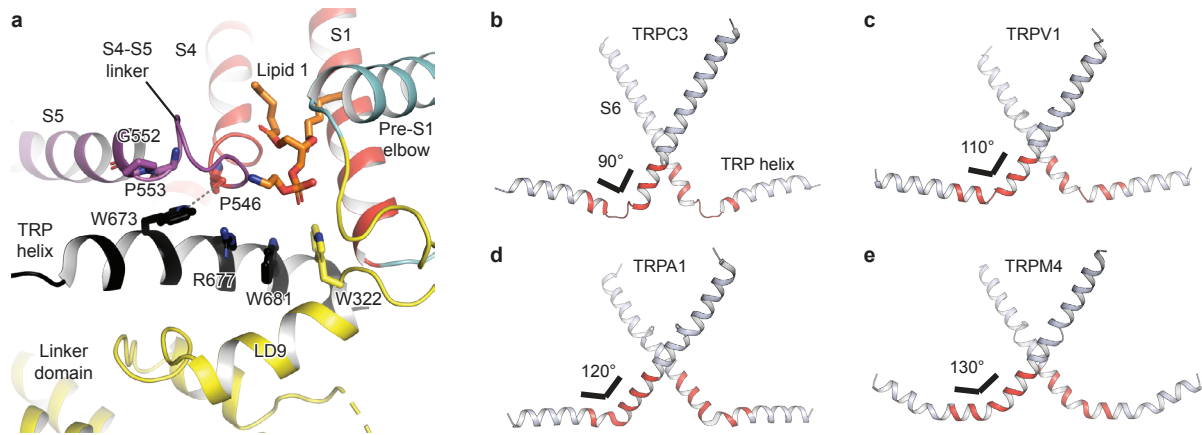



Figure 5

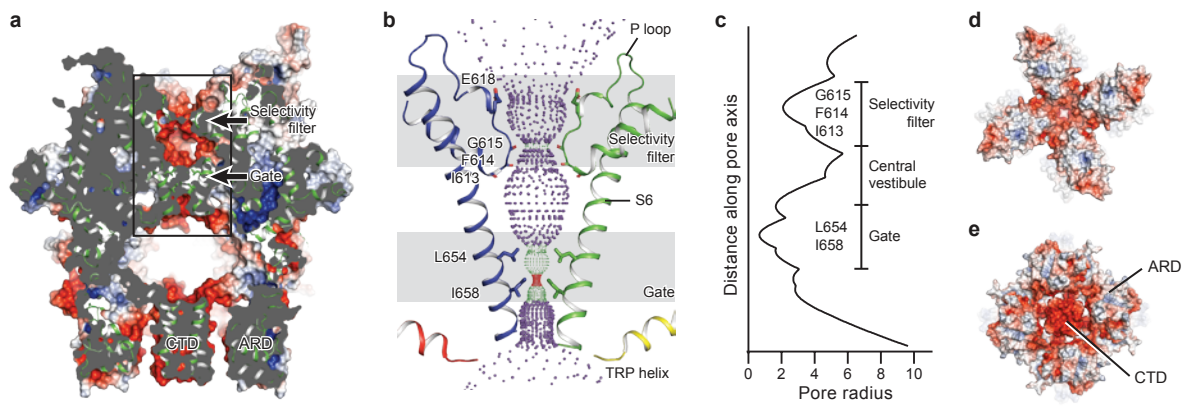

Figure 6

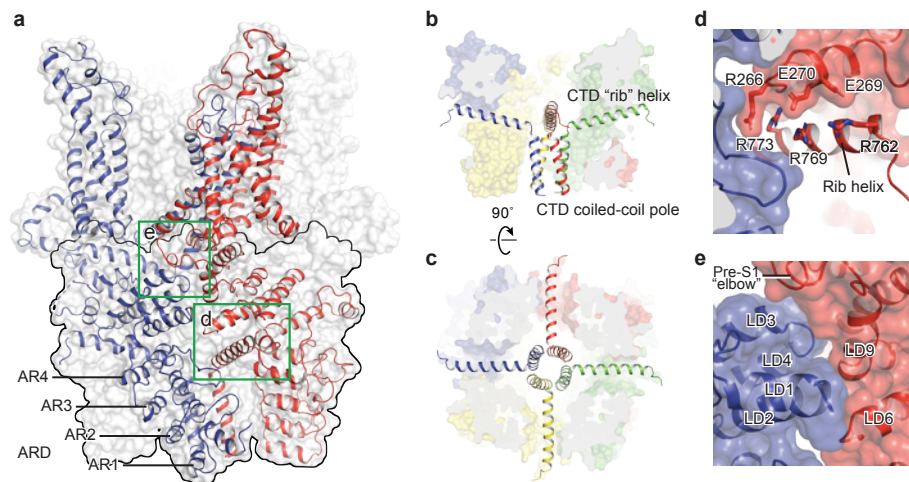

FigS1

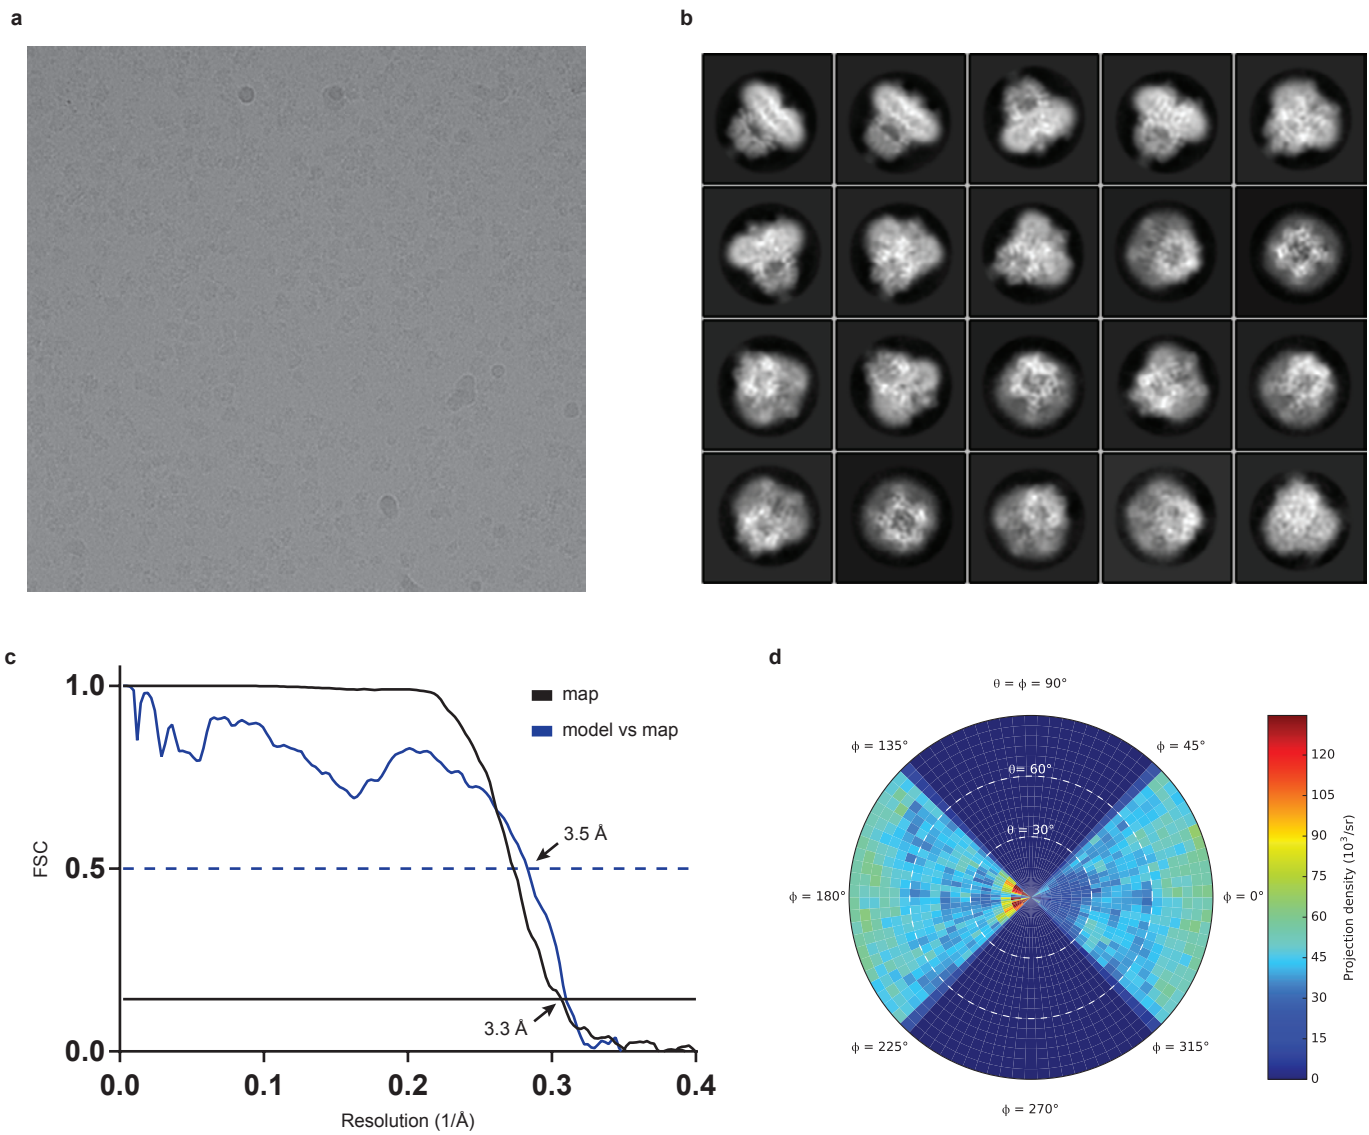

FigS2

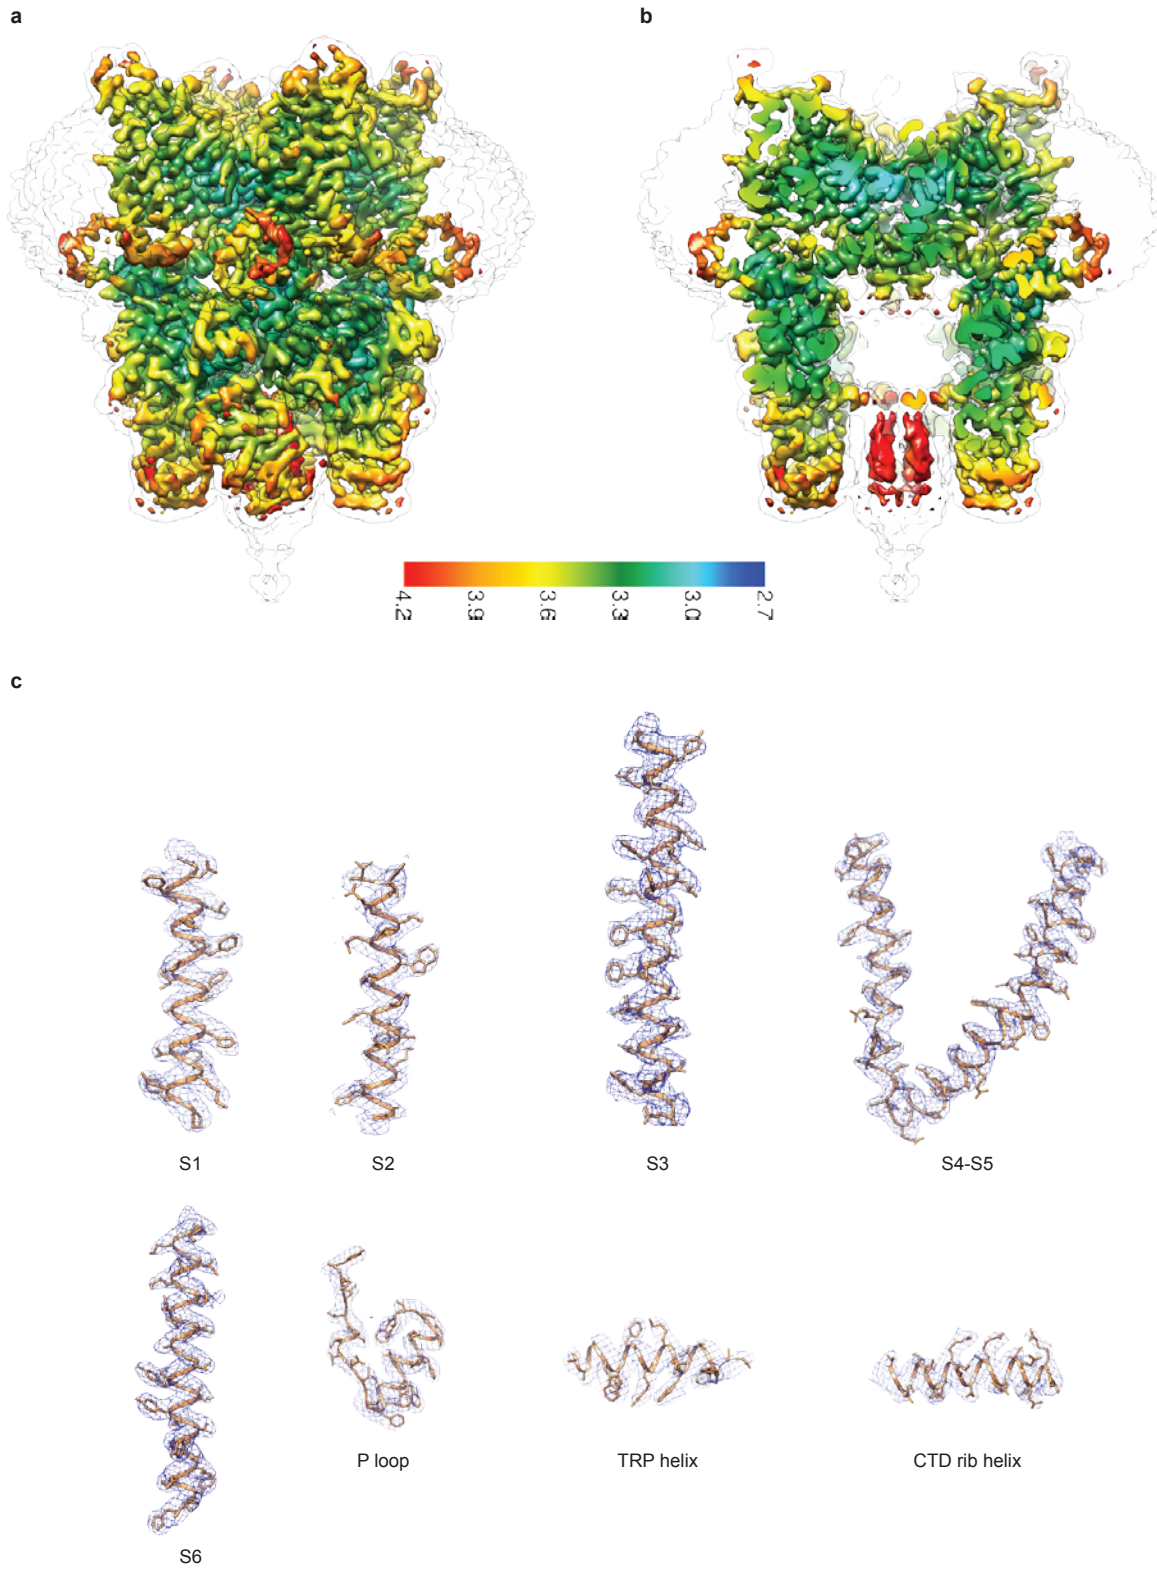



# FigS3

|             |      |                                                                               |      |
|-------------|------|-------------------------------------------------------------------------------|------|
| Human_TRPC3 | 1    | -----MREKGRRQAVRGPAFMFNDRGTSLTAEERFLDAAEYGNIPVVRKMLEE                         | 49   |
| Human_TRPC6 | 56   | -----DNRLAHRRTVLRKGRRLANRGPAYMFSRSTSLSEERFLDAAEYGNIPVVRKMLEE                  | 120  |
| Human_TRPC7 | 1    | -----TFKNMQRRHTTLREKGRRQAIRGPAYMFNEKGTSLTPEERFLDAAEYGNIPVVRKMLEE              | 65   |
| Human_TRPC1 | 8    | -----GASSSSLPSSPSSSSP-----EVMALKDVRVKEENTLNEKFLFLLACDGGDYVMVKILEE             | 69   |
| Human_TRPC4 | 7    | -----APYRD-----RIPLRIVRAEELSPSEKAYLNAVKEKGYDASVKKLLEE                         | 54   |
| Human_TRPC5 | 7    | -----SPYRD-----RIPLQIVRAEELSABEKAFLNAVEKGYDATTVKQLQE                          | 54   |
| Mouse_TRPC2 | 241  | -----SVLRRHVHALTPV-PL--VPKQPWNTEIIVNKKLKKFPPTLRLRIQEQQLGLVQQLLES              | 324  |
| Human_TRPC3 | 50   | -----CVDYMGQNALQLAVGNEHLEVTELLK--KENLARIGDALLLAIISKGYVRIVEAILNHGPAFAAKR       | 120  |
| Human_TRPC6 | 121  | -----CVDYMGQNALQLAVANEHLEITELLK--KENLSRVGDALLLAIISKGYVRIVEAILNSHPAFAEGR       | 191  |
| Human_TRPC7 | 66   | -----CVDYMGQNALQLAVGNEHLEVTELLK--KENLARVGDALLLAIISKGYVRIVEAILNHGPAFAEGR       | 136  |
| Human_TRPC1 | 70   | -----CVDVLRGNVAITITENENLDLQLLDDY---GCQSADALLVAIDSEVVGAVDILLNHRPKRSSRP         | 140  |
| Human_TRPC4 | 55   | -----CIDPLGRRTALLIAIENENLELIELLSF---NYYVGDALLHAIIRKEVVGAVELLNHHKPSGEKQ        | 126  |
| Human_TRPC5 | 55   | -----CMDPLGRSALLIAIENENLELIELLNH---SVYVGDALLYAIRKEVVGAVELLNHRKPSGEKQ          | 126  |
| Mouse_TRPC2 | 325  | -----DRSWREALNLAIRLGVETDVLINLVANVKFDFRQIHEALLVAVDTNQPAVVRLLARLERKEGRK         | 408  |
| Human_TRPC3 | 121  | -----LAAHCQYEVVHMLLMKGARIEPHDYFCCKGDCMEKQRHDSFHSRSRINAYK                      | 207  |
| Human_TRPC6 | 192  | -----IVHTLLRKGARIEPHDYFCCKCNDNCQKQKHSFHSRSRINAYK                              | 278  |
| Human_TRPC7 | 137  | -----LAAHCQYEVIVHLLRKGARIEPHDYFCCKNECTEKQRKDSFHSRSRINAYK                      | 223  |
| Human_TRPC1 | 141  | -----LAAHRNNEYILTMLLKQDVSPLPKPHAVGCECTLCSAKNKDSLRHSRRLDIYR                    | 218  |
| Human_TRPC4 | 127  | -----LAAHTNNEYIKLLVQKGVSPRPHEVRCNCEVCSSSDVDSLRSRRLNIYK                        | 201  |
| Human_TRPC5 | 127  | -----LAAHTNNEYIKLLVQKGVSPRPHEVRCNCEVCSSSDVDSLRSRRLNIYK                        | 201  |
| Mouse_TRPC2 | 409  | -----LAAHTNNEYIKLLVQKGVSPRPHEVRCNCEVCSSSDVDSLRSRRLNIYK                        | 490  |
| Human_TRPC3 | 208  | -----LAKLANIEKEFKNDYRKLKSMQCKDFVVGVLDLCDRDEEVEAILNGDLESAEP-----LE             | 286  |
| Human_TRPC6 | 279  | -----LAKLANIEKEFKNDYRKLKSMQCKDFVVGVLDLCDRDEEVEAILNGDVFVQ-----S                | 355  |
| Human_TRPC7 | 224  | -----LAKLANIEKEFKNDYRKLKSMQCKDFVVGVLDLCDRDEEVEAILNGDVFVQ-----S                | 300  |
| Human_TRPC1 | 219  | -----LAKLANIEKEFKNDYRKLKSMQCKDFVVGVLDLCDRDEEVEAILNGDVFVQ-----S                | 299  |
| Human_TRPC4 | 202  | -----LAKLANIEKEFKNDYRKLKSMQCKDFVVGVLDLCDRDEEVEAILNGDVFVQ-----S                | 278  |
| Human_TRPC5 | 202  | -----LAKLANIEKEFKNDYRKLKSMQCKDFVVGVLDLCDRDEEVEAILNGDVFVQ-----S                | 279  |
| Mouse_TRPC2 | 491  | -----LAKLANIEKEFKNDYRKLKSMQCKDFVVGVLDLCDRDEEVEAILNGDVFVQ-----S                | 577  |
| Human_TRPC3 | 287  | -----LKYEVKFFVAHPNCQQQLTIWYENLSGLREQTIAIKCLVVLVVALGLPFLAIGYWIAPCSRIGKILRSPFMK | 373  |
| Human_TRPC6 | 356  | -----LKYEVKFFVAHPNCQQQLTIWYENLSGLREQTIAIKCLVVLVVALGLPFLAIGYWIAPCSRIGKILRSPFMK | 442  |
| Human_TRPC7 | 301  | -----LKYEVKFFVAHPNCQQQLTIWYENLSGLREQTIAIKCLVVLVVALGLPFLAIGYWIAPCSRIGKILRSPFMK | 387  |
| Human_TRPC1 | 300  | -----LKYEVKFFVAHPNCQQQLTIWYENLSGLREQTIAIKCLVVLVVALGLPFLAIGYWIAPCSRIGKILRSPFMK | 386  |
| Human_TRPC4 | 279  | -----LKYEVKFFVAHPNCQQQLTIWYENLSGLREQTIAIKCLVVLVVALGLPFLAIGYWIAPCSRIGKILRSPFMK | 365  |
| Human_TRPC5 | 280  | -----LKYEVKFFVAHPNCQQQLTIWYENLSGLREQTIAIKCLVVLVVALGLPFLAIGYWIAPCSRIGKILRSPFMK | 366  |
| Mouse_TRPC2 | 578  | -----LKYEVKFFVAHPNCQQQLTIWYENLSGLREQTIAIKCLVVLVVALGLPFLAIGYWIAPCSRIGKILRSPFMK | 664  |
| Human_TRPC3 | 374  | -----LKYEVKFFVAHPNCQQQLTIWYENLSGLREQTIAIKCLVVLVVALGLPFLAIGYWIAPCSRIGKILRSPFMK | 460  |
| Human_TRPC6 | 443  | -----LKYEVKFFVAHPNCQQQLTIWYENLSGLREQTIAIKCLVVLVVALGLPFLAIGYWIAPCSRIGKILRSPFMK | 529  |
| Human_TRPC7 | 388  | -----LKYEVKFFVAHPNCQQQLTIWYENLSGLREQTIAIKCLVVLVVALGLPFLAIGYWIAPCSRIGKILRSPFMK | 474  |
| Human_TRPC1 | 387  | -----LKYEVKFFVAHPNCQQQLTIWYENLSGLREQTIAIKCLVVLVVALGLPFLAIGYWIAPCSRIGKILRSPFMK | 458  |
| Human_TRPC4 | 366  | -----LKYEVKFFVAHPNCQQQLTIWYENLSGLREQTIAIKCLVVLVVALGLPFLAIGYWIAPCSRIGKILRSPFMK | 437  |
| Human_TRPC5 | 367  | -----LKYEVKFFVAHPNCQQQLTIWYENLSGLREQTIAIKCLVVLVVALGLPFLAIGYWIAPCSRIGKILRSPFMK | 438  |
| Mouse_TRPC2 | 665  | -----LKYEVKFFVAHPNCQQQLTIWYENLSGLREQTIAIKCLVVLVVALGLPFLAIGYWIAPCSRIGKILRSPFMK | 737  |
| Human_TRPC3 | 461  | -----LKYEVKFFVAHPNCQQQLTIWYENLSGLREQTIAIKCLVVLVVALGLPFLAIGYWIAPCSRIGKILRSPFMK | 546  |
| Human_TRPC6 | 530  | -----LKYEVKFFVAHPNCQQQLTIWYENLSGLREQTIAIKCLVVLVVALGLPFLAIGYWIAPCSRIGKILRSPFMK | 615  |
| Human_TRPC7 | 475  | -----LKYEVKFFVAHPNCQQQLTIWYENLSGLREQTIAIKCLVVLVVALGLPFLAIGYWIAPCSRIGKILRSPFMK | 560  |
| Human_TRPC1 | 459  | -----LKYEVKFFVAHPNCQQQLTIWYENLSGLREQTIAIKCLVVLVVALGLPFLAIGYWIAPCSRIGKILRSPFMK | 518  |
| Human_TRPC4 | 438  | -----LKYEVKFFVAHPNCQQQLTIWYENLSGLREQTIAIKCLVVLVVALGLPFLAIGYWIAPCSRIGKILRSPFMK | 497  |
| Human_TRPC5 | 439  | -----LKYEVKFFVAHPNCQQQLTIWYENLSGLREQTIAIKCLVVLVVALGLPFLAIGYWIAPCSRIGKILRSPFMK | 498  |
| Mouse_TRPC2 | 738  | -----LKYEVKFFVAHPNCQQQLTIWYENLSGLREQTIAIKCLVVLVVALGLPFLAIGYWIAPCSRIGKILRSPFMK | 812  |
| Human_TRPC3 | 547  | -----LKYEVKFFVAHPNCQQQLTIWYENLSGLREQTIAIKCLVVLVVALGLPFLAIGYWIAPCSRIGKILRSPFMK | 618  |
| Human_TRPC6 | 616  | -----LKYEVKFFVAHPNCQQQLTIWYENLSGLREQTIAIKCLVVLVVALGLPFLAIGYWIAPCSRIGKILRSPFMK | 687  |
| Human_TRPC7 | 561  | -----LKYEVKFFVAHPNCQQQLTIWYENLSGLREQTIAIKCLVVLVVALGLPFLAIGYWIAPCSRIGKILRSPFMK | 632  |
| Human_TRPC1 | 519  | -----LKYEVKFFVAHPNCQQQLTIWYENLSGLREQTIAIKCLVVLVVALGLPFLAIGYWIAPCSRIGKILRSPFMK | 603  |
| Human_TRPC4 | 498  | -----LKYEVKFFVAHPNCQQQLTIWYENLSGLREQTIAIKCLVVLVVALGLPFLAIGYWIAPCSRIGKILRSPFMK | 579  |
| Human_TRPC5 | 499  | -----LKYEVKFFVAHPNCQQQLTIWYENLSGLREQTIAIKCLVVLVVALGLPFLAIGYWIAPCSRIGKILRSPFMK | 583  |
| Mouse_TRPC2 | 813  | -----LKYEVKFFVAHPNCQQQLTIWYENLSGLREQTIAIKCLVVLVVALGLPFLAIGYWIAPCSRIGKILRSPFMK | 881  |
| Human_TRPC3 | 619  | -----LKYEVKFFVAHPNCQQQLTIWYENLSGLREQTIAIKCLVVLVVALGLPFLAIGYWIAPCSRIGKILRSPFMK | 703  |
| Human_TRPC6 | 688  | -----LKYEVKFFVAHPNCQQQLTIWYENLSGLREQTIAIKCLVVLVVALGLPFLAIGYWIAPCSRIGKILRSPFMK | 772  |
| Human_TRPC7 | 633  | -----LKYEVKFFVAHPNCQQQLTIWYENLSGLREQTIAIKCLVVLVVALGLPFLAIGYWIAPCSRIGKILRSPFMK | 717  |
| Human_TRPC1 | 604  | -----LKYEVKFFVAHPNCQQQLTIWYENLSGLREQTIAIKCLVVLVVALGLPFLAIGYWIAPCSRIGKILRSPFMK | 690  |
| Human_TRPC4 | 580  | -----LKYEVKFFVAHPNCQQQLTIWYENLSGLREQTIAIKCLVVLVVALGLPFLAIGYWIAPCSRIGKILRSPFMK | 665  |
| Human_TRPC5 | 584  | -----LKYEVKFFVAHPNCQQQLTIWYENLSGLREQTIAIKCLVVLVVALGLPFLAIGYWIAPCSRIGKILRSPFMK | 669  |
| Mouse_TRPC2 | 882  | -----LKYEVKFFVAHPNCQQQLTIWYENLSGLREQTIAIKCLVVLVVALGLPFLAIGYWIAPCSRIGKILRSPFMK | 965  |
| Human_TRPC3 | 704  | -----LKYEVKFFVAHPNCQQQLTIWYENLSGLREQTIAIKCLVVLVVALGLPFLAIGYWIAPCSRIGKILRSPFMK | 767  |
| Human_TRPC6 | 773  | -----LKYEVKFFVAHPNCQQQLTIWYENLSGLREQTIAIKCLVVLVVALGLPFLAIGYWIAPCSRIGKILRSPFMK | 859  |
| Human_TRPC7 | 718  | -----LKYEVKFFVAHPNCQQQLTIWYENLSGLREQTIAIKCLVVLVVALGLPFLAIGYWIAPCSRIGKILRSPFMK | 784  |
| Human_TRPC1 | 691  | -----LKYEVKFFVAHPNCQQQLTIWYENLSGLREQTIAIKCLVVLVVALGLPFLAIGYWIAPCSRIGKILRSPFMK | 735  |
| Human_TRPC4 | 666  | -----LKYEVKFFVAHPNCQQQLTIWYENLSGLREQTIAIKCLVVLVVALGLPFLAIGYWIAPCSRIGKILRSPFMK | 710  |
| Human_TRPC5 | 670  | -----LKYEVKFFVAHPNCQQQLTIWYENLSGLREQTIAIKCLVVLVVALGLPFLAIGYWIAPCSRIGKILRSPFMK | 717  |
| Mouse_TRPC2 | 966  | -----LKYEVKFFVAHPNCQQQLTIWYENLSGLREQTIAIKCLVVLVVALGLPFLAIGYWIAPCSRIGKILRSPFMK | 1020 |
| Human_TRPC3 | 768  | -----LKYEVKFFVAHPNCQQQLTIWYENLSGLREQTIAIKCLVVLVVALGLPFLAIGYWIAPCSRIGKILRSPFMK | 827  |
| Human_TRPC6 | 860  | -----LKYEVKFFVAHPNCQQQLTIWYENLSGLREQTIAIKCLVVLVVALGLPFLAIGYWIAPCSRIGKILRSPFMK | 919  |
| Human_TRPC7 | 785  | -----LKYEVKFFVAHPNCQQQLTIWYENLSGLREQTIAIKCLVVLVVALGLPFLAIGYWIAPCSRIGKILRSPFMK | 844  |
| Human_TRPC1 | 736  | -----LKYEVKFFVAHPNCQQQLTIWYENLSGLREQTIAIKCLVVLVVALGLPFLAIGYWIAPCSRIGKILRSPFMK | 793  |
| Human_TRPC4 | 711  | -----LKYEVKFFVAHPNCQQQLTIWYENLSGLREQTIAIKCLVVLVVALGLPFLAIGYWIAPCSRIGKILRSPFMK | 796  |
| Human_TRPC5 | 718  | -----LKYEVKFFVAHPNCQQQLTIWYENLSGLREQTIAIKCLVVLVVALGLPFLAIGYWIAPCSRIGKILRSPFMK | 798  |
| Mouse_TRPC2 | 1021 | -----LKYEVKFFVAHPNCQQQLTIWYENLSGLREQTIAIKCLVVLVVALGLPFLAIGYWIAPCSRIGKILRSPFMK | 1096 |
| Human_TRPC3 | 828  | -----RCE-----                                                                 | 836  |
| Human_TRPC6 | 920  | -----QEETNR-----                                                              | 931  |
| Human_TRPC7 | 845  | -----KDHRLRVNKGKDI-----                                                       | 862  |
| Human_TRPC1 | 797  | -----SERHNINSNGSALVVQE-----PP-----REKQ                                        | 833  |
| Human_TRPC4 | 799  | -----KKTCHGPPILRTM-----PRSSGAQGKSKEASS                                        | 833  |
| Human_TRPC5 | 799  | -----KKTCHGPPILRTM-----PRSSGAQGKSKEASS                                        | 833  |
| Mouse_TRPC2 | 1097 | -----LGPPTSDTPAELTMPGIVETVSLGDLGDTGEGAGAPPEGSSSS-----                         | 1143 |

FigS4

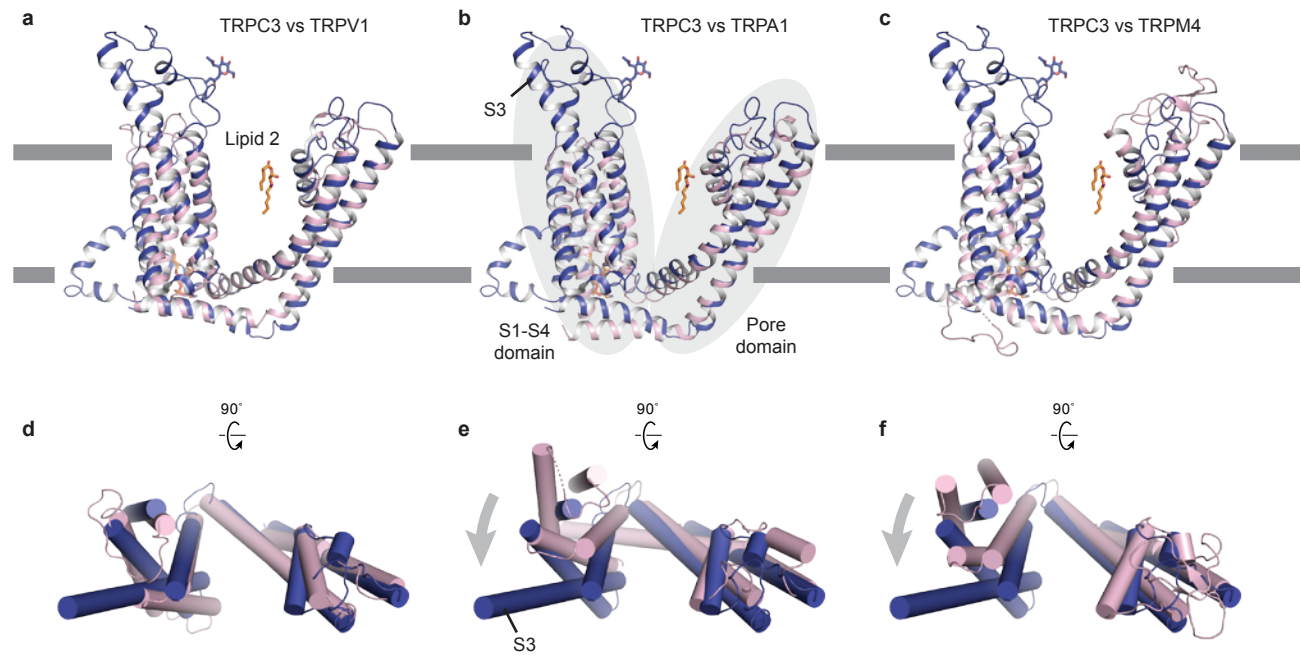

---

| <b>Data collection/processing</b>         |                   |
|-------------------------------------------|-------------------|
| Microscope                                | Titan Krios (FEI) |
| Voltage (kV)                              | 300               |
| Defocus range ( $\mu\text{M}$ )           | 1.0 – 2.5         |
| Exposure time (s)                         | 8                 |
| Dose rate ( $e^-/\text{\AA}^2/\text{s}$ ) | 6.76              |
| Number of frames                          | 40                |
| Pixel size ( $\text{\AA}$ )               | 1.074             |
| Particles refined                         | 143855            |
| Resolution ( $\text{\AA}$ )               | 3.3               |
| FSC threshold                             | 0.143             |
| Resolution range ( $\text{\AA}$ )         | 412.4 – 3.3       |

---

| <b>Model statistics</b>      |       |
|------------------------------|-------|
| Number of atoms              | 20988 |
| Protein                      | 20744 |
| Ligand                       | 244   |
| r.m.s. deviations            |       |
| Bond length ( $\text{\AA}$ ) | 0.005 |
| Bond angle ( $^\circ$ )      | 1.008 |
| Ramachandran plot            |       |
| Favored (%)                  | 94.09 |
| Allowed (%)                  | 5.77  |
| Disallowed (%)               | 0.14  |
| Rotamer outlier (%)          | 0.85  |
| Clashscore                   | 3.0   |

---
